# Supplementary material for: CTCF promotes colorectal cancer cell proliferation and chemotherapy resistance to 5-FU via the P53-Hedgehog axis
Source: publisher site journal article supplement (doi:10.18632/aging.103648), 2020-07-20
Supplement: Supplementary file [file aging-v12i16-103648-supplementary-material-SD2.pdf]

## SUPPLEMENTARY TABLE

Supplementary Table 1. Primer sequences used for real-time PCR or CHIP-PCR (5' to 3').

| Gene     | Forward primer          | Reverse primer            |
|----------|-------------------------|---------------------------|
| GAPDH    | CGAGCCACATCGCTCAGACA    | GTGGTGAAGACGCCAGTGGA      |
| CTCF     | CCCAAACAGAACCAGCCAAC    | TCCTCTCCTCTCCCTCTGC       |
| ABCG2    | CTCTTCTTCCTGACGACCAACCA | ATGACACTCTGTAGTATCCGCTGAT |
| TP53     | CAGCACATGACGGAGGTTGT    | TCATCCAAATACTCCACACGC     |
| CTCF-CBS | CATTGTTGTATTCCTGAGTGCC  | GAGTCCCGCGGTAAT TCTT      |
